# Supplementary material
Source: publisher site journal article supplement (https://www.spandidos-publications.com/7748/downloadSupplementary)
Supplement: Supplementary file 1 [file downloadSupplementary]

## Sheet: Sheet1
Table SII. The causal relationship between 76 miRNAs and IVDD.
Exposure	Outcome	method	nsnp	b	se	pval	lo_ci	up_ci	or	or_lci95	or_uci95
hsa-miR-26b-5p	finngen_R5_M13_LOWBACKPAINORANDSCIATICA	MR Egger	3	0.149871453994711	0.0636583627641086	0.255705647268897	0.0251010629770578	0.274641845012364	1.16168490317628	1.02541874715925	1.31605923726894
		Weighted median	3	-0.0393204	0.0172906889625208	0.0229611683321941	-0.0732102	-0.00543066	0.961442601620655	0.929405483036669	0.994584057316802
		Inverse variance weighted	3	-0.0394147	0.0312676666661633	0.207468562719238	-0.100699	0.021869956079343	0.961351982091799	0.904204888904723	1.02211085652426
		Simple mode	3	-0.0862756	0.0349360287373428	0.132219436488521	-0.15475	-0.017801	0.917341397593349	0.85662914187449	0.982356539840686
		Weighted mode	3	0.00272154072428366	0.0200014075929106	0.904228044236341	-0.0364812	0.0419242996063884	1.00272524747817	0.964176202731537	1.04281553421633
hsa-miR-27b-3p	finngen_R5_M13_LOWBACKPAINORANDSCIATICA	MR Egger	3	0.0456062032716042	0.172104714172353	0.835091709430089	-0.291719	0.382931443049415	1.04666215765684	0.746978380148175	1.46657748254182
		Weighted median	3	0.108830322746358	0.0315722324993336	0.000566792939851925	0.0469487470476642	0.170711898445052	1.11497314870854	1.0480682911089	1.18614896842811
		Inverse variance weighted	3	0.110954768508723	0.0263840331002644	2.60648948470354e-05	0.059242063632205	0.162667473385242	1.11734436655949	1.06103204692835	1.17664535873018
		Simple mode	3	0.109291125181493	0.0382471456483462	0.103756678685675	0.0343267197107347	0.184255530652252	1.11548704944483	1.03492268113634	1.2023230142303
		Weighted mode	3	0.105681143120024	0.0395210351457131	0.116012735517355	0.0282199142344262	0.183142372005621	1.1114674209652	1.02862186814065	1.20098538260719
hsa-miR-30a-3p	finngen_R5_M13_LOWBACKPAINORANDSCIATICA	MR Egger	5	-0.0222891	0.0291943632506588	0.50073123319123	-0.07951	0.034931854460884	0.977957469110111	0.923568738534835	1.03554913834081
		Weighted median	5	-0.00139879	0.0111124944378111	0.899830651655933	-0.0231793	0.0203817007624923	0.998602189512799	0.977087298366973	1.02059082598495
		Inverse variance weighted	5	-0.00515986	0.00953697819336248	0.588482180223628	-0.0238523	0.0135326205718764	0.994853432506798	0.976429884660751	1.01362460092506
		Simple mode	5	-0.00174852	0.0173433008843769	0.924546019662465	-0.0357414	0.0322443488659756	0.998253006904632	0.964889790789666	1.03276983061309
		Weighted mode	5	-0.000418327	0.0126181458209961	0.975141106340786	-0.0251499	0.0243132391879135	0.999581760865142	0.975163731411192	1.0246112160143
hsa-miR-31-5p	finngen_R5_M13_LOWBACKPAINORANDSCIATICA	MR Egger	4	0.0895012024393646	0.0449476308518463	0.184701714554261	0.00140384596974587	0.177598558908983	1.0936286483337	1.00140483182277	1.1943457655174
		Weighted median	4	0.0550703156737946	0.0201238986548908	0.00620847133263202	0.0156274743102087	0.0945131570373805	1.05661490865269	1.01575022186472	1.09912362424847
		Inverse variance weighted	4	0.0505588423297147	0.0160640073772802	0.00164765028454514	0.0190733878702454	0.0820442967891839	1.05185875535375	1.0192564469326	1.08550389310168
		Simple mode	4	0.0551073755283755	0.0237805146305535	0.10333566189086	0.0084975668524906	0.10171718420426	1.05665406737316	1.00853377365761	1.10707033047292
		Weighted mode	4	0.0563404211406665	0.0220656959718893	0.0837012738085866	0.0130916570357634	0.0995891852455695	1.0579577736341	1.01317772797133	1.10471699080273
hsa-miR-100-5p	finngen_R5_M13_LOWBACKPAINORANDSCIATICA	MR Egger	13	-0.0056795	0.00586413479451163	0.353600180843853	-0.0171732	0.00581420033026145	0.994336594024675	0.982973410967252	1.00583113559877
		Weighted median	13	-0.00484962	0.00294057240684784	0.0991050189717835	-0.0106131	0.000913906227155754	0.995162124709429	0.989442983023124	1.0009143239667
		Inverse variance weighted	13	-0.00594502	0.00308112018737949	0.0536690353221841	-0.011984	9.39795129881469e-05	0.994072620586322	0.988087510652712	1.0000939839292
		Simple mode	13	-0.00255763	0.00599949325558537	0.677431200248159	-0.0143166	0.00920137898505299	0.997445640147422	0.985785361110808	1.00924384181159
		Weighted mode	13	-0.00405599	0.00297042872137032	0.197159516334307	-0.00987803	0.00176605014244667	0.995952224266996	0.99017059705107	1.00176761052744
hsa-miR-125b-5p	finngen_R5_M13_LOWBACKPAINORANDSCIATICA	MR Egger	16	-0.0193206	0.0133988362622582	0.171309409042013	-0.0455823	0.00694114511012053	0.980864872096719	0.955440973196425	1.00696529069151
		Weighted median	16	-0.00787217	0.00607726454080699	0.195200209555752	-0.0197836	0.00403926606436386	0.992158731965713	0.980410800530777	1.00404743489452
		Inverse variance weighted	16	-0.0103339	0.00613092403813715	0.0918838407914333	-0.0223505	0.00168267453772834	0.989719275092491	0.977897375292677	1.00168409102891
		Simple mode	16	-0.00563877	0.0123828968854851	0.655366943547243	-0.0299092	0.0186317103471636	0.994377100461995	0.970533609898692	1.01880636367288
		Weighted mode	16	-0.00739115	0.00626185687982545	0.256242904971974	-0.0196644	0.00488208671212816	0.9926360946261	0.980527690778721	1.00489402351506
hsa-miR-127-3p	finngen_R5_M13_LOWBACKPAINORANDSCIATICA	MR Egger	13	-0.00361922	0.0120498152299593	0.769506634117153	-0.0272369	0.0199984146522914	0.996387318295762	0.973130717461632	1.02019972265418
		Weighted median	13	-0.00309985	0.0068827377368112	0.652436485422305	-0.01659	0.0103903187513784	0.996904952353012	0.983546843230011	1.01044448555415
		Inverse variance weighted	13	-0.00328523	0.00696201513433111	0.637013012912056	-0.0169308	0.0103603195068105	0.996720160307525	0.983211740373343	1.01041417343758
		Simple mode	13	-0.0198332	0.012779909909104	0.14664796760801	-0.0448818	0.00521543202717591	0.980362192518225	0.956110473247729	1.00522905606758
		Weighted mode	13	6.92115493162032e-05	0.00720658290409007	0.992495105391804	-0.0140557	0.0141941140413327	1.00006921394449	0.98604262909018	1.01429532879565
hsa-miR-130a-3p	finngen_R5_M13_LOWBACKPAINORANDSCIATICA	MR Egger	5	-0.158872	0.38872224332063	0.710181509049908	-0.920768	0.603023501690674	0.853105468260327	0.398213218558327	1.82763631657062
		Weighted median	5	0.0187683122848742	0.020371943600774	0.356903028183857	-0.0211607	0.0586973217423912	1.01894554410226	0.979061619493248	1.06045421572467
		Inverse variance weighted	5	0.0112235318537243	0.0167267448619017	0.502224869329592	-0.0215609	0.0440079517830516	1.0112867519837	0.978669886328942	1.04499066439446
		Simple mode	5	0.0204917230834304	0.0254333212536168	0.46558264632243	-0.0293576	0.0703410327405192	1.02070311993366	0.971069161080695	1.07287400403373
		Weighted mode	5	0.0200030432730915	0.0264289111687746	0.491265925157413	-0.0317976	0.0718037091638897	1.02020444478277	0.968702605740721	1.07444441976973
hsa-miR-130b-3p	finngen_R5_M13_LOWBACKPAINORANDSCIATICA	MR Egger	4	0.0373124825007093	0.0535241660136872	0.557863477938217	-0.0675949	0.142219847887536	1.03801733241648	0.934639035159594	1.15283006793425
		Weighted median	4	0.0247912999522687	0.0262737337534638	0.345385673484275	-0.0267052	0.0762878181090578	1.02510115953745	0.973648212993668	1.07927316381964
		Inverse variance weighted	4	0.01832450904208	0.0215991352795308	0.396220328920006	-0.0240098	0.0606588141899604	1.01849343309714	0.976276146006649	1.06253633001797
		Simple mode	4	0.0287377639358256	0.0348626597894719	0.470188068008051	-0.039593	0.0970685771231904	1.02915467761363	0.961180512702139	1.10193593862658
		Weighted mode	4	0.0332612515066231	0.0304445150582383	0.35448609393313	-0.02641	0.0929325010207701	1.03382059115105	0.973935696044227	1.09738766022123
hsa-miR-132-3p	finngen_R5_M13_LOWBACKPAINORANDSCIATICA	MR Egger	3	-0.303144	0.194173629681382	0.362676480418846	-0.683724	0.0774362543134532	0.738492701550341	0.504733670466784	1.08051335219771
		Weighted median	3	0.0430779479306808	0.0334710215600656	0.198086549143206	-0.0225253	0.108681150188409	1.04401927082078	0.977726545055614	1.11480683771673
		Inverse variance weighted	3	0.0135383161653166	0.0326512697537486	0.678410088070653	-0.0504582	0.0775348048826639	1.01363037413513	0.95079369711451	1.08061984265087
		Simple mode	3	0.0521359704745932	0.047881290337125	0.389936479173586	-0.0417114	0.145983299535358	1.05351898025083	0.959146590049044	1.15717686249815
		Weighted mode	3	0.0528730938218974	0.0509618032212694	0.408482696317233	-0.047012	0.152758228135585	1.05429583997355	0.954075909978051	1.16504327020593
hsa-miR-133a	finngen_R5_M13_LOWBACKPAINORANDSCIATICA	MR Egger	4	0.0135439968479019	0.00889592064837399	0.267318814950276	-0.00389201	0.030980001318715	1.0136361322639	0.996115556422468	1.03146487574295
		Weighted median	4	0.00161098212318074	0.00336568939289664	0.632188720823083	-0.00498577	0.00820773333325816	1.00161228045198	0.995026639229565	1.00824150912081
		Inverse variance weighted	4	-0.000828434	0.00520352974772722	0.873506489438566	-0.0110274	0.00937048457125229	0.999171909322193	0.989033226329193	1.00941452501442
		Simple mode	4	0.00166005008687348	0.00390432744820375	0.699358687364802	-0.00599243	0.00931253188535283	1.00166142873279	0.994025487097024	1.00935602842654
		Weighted mode	4	0.00166005008687348	0.00355231152973149	0.672123704147623	-0.00530248	0.0086225806851472	1.00166142873279	0.994711552823602	1.00865986221127
hsa-miR-139-5p	finngen_R5_M13_LOWBACKPAINORANDSCIATICA	MR Egger	4	0.0192238041832469	0.0657315748256337	0.797485172073155	-0.10961	0.148057690841489	1.01940977126031	0.896183504833604	1.15957979156728
		Weighted median	4	0.024507364641195	0.0192425647632383	0.202804582814641	-0.0132081	0.062222791577142	1.02481013843837	0.986878781393956	1.06419941298426
		Inverse variance weighted	4	0.0234389017801362	0.0165692973289811	0.157186273071619	-0.00903692	0.0559147245449392	1.02371575162576	0.991003789261719	1.05750750045812
		Simple mode	4	0.00710887586563899	0.0292917841339641	0.823890575545478	-0.050303	0.0645207727682087	1.00713420390607	0.950941225641507	1.06664773524068
		Weighted mode	4	0.0058071835681598	0.0296002140688627	0.857001215879138	-0.0522092	0.0638236031431306	1.00582407794574	0.949130253840861	1.06590435999844
hsa-miR-151a-3p	finngen_R5_M13_LOWBACKPAINORANDSCIATICA	MR Egger	6	-0.0161985	0.0515683732449343	0.769133327086799	-0.117272	0.0848755456243813	0.983932023686352	0.889342834237888	1.0885815795268
		Weighted median	6	0.0132140184962799	0.018664247607899	0.478954201428397	-0.0233679	0.0497959438077618	1.01330170946301	0.976903008376035	1.0510565998845
		Inverse variance weighted	6	0.0141713601615477	0.0216213552642362	0.512188700450441	-0.0282065	0.0565492164794506	1.01427224990424	0.972187593071233	1.05817869334857
		Simple mode	6	0.0396185308930057	0.0342795096524654	0.300006606206345	-0.0275693	0.106806369811838	1.04041381275488	0.972807256866427	1.1127187776723
		Weighted mode	6	0.0110793427120607	0.0189250835423659	0.583682262635338	-0.0260138	0.0481725064550978	1.01114094592703	0.974321623386353	1.04935165964677
hsa-miR-151a-5p	finngen_R5_M13_LOWBACKPAINORANDSCIATICA	MR Egger	5	-0.0568565	0.0305723510876293	0.159871711136433	-0.116778	0.00306528541086072	0.944729606876501	0.889782408612161	1.00306998820209
		Weighted median	5	0.0484351548170342	0.0217609407905865	0.0260286500182766	0.00578371086748471	0.0910865987665838	1.04962730633876	1.00580046881531	1.09536385831042
		Inverse variance weighted	5	0.0388041169267957	0.0305197611348215	0.203571323199998	-0.0210146	0.0986228487510459	1.03956683015918	0.979204653489285	1.10364997808809
		Simple mode	5	0.0907899013178657	0.039769319536471	0.0845146061504927	0.0128420350263826	0.168737767609349	1.09503891485557	1.01292484807452	1.18380966497906
		Weighted mode	5	-0.013173	0.023793683960727	0.609318731100644	-0.0598086	0.0334626628904935	0.986913426008844	0.941944825068264	1.03402883535766
hsa-miR-152	finngen_R5_M13_LOWBACKPAINORANDSCIATICA	MR Egger	7	-0.0160604	0.0360082072305362	0.674234099458917	-0.0866365	0.0545156956182177	0.984067889856111	0.91701038966903	1.05602905131246
		Weighted median	7	0.0204530736528119	0.0187926431596306	0.276438265998266	-0.0163805	0.0572866542456879	1.02066367110159	0.983752924014761	1.05895932207765
		Inverse variance weighted	7	0.0286591163220554	0.0147013987890768	0.0512459738997221	-0.000155625	0.057473857948646	1.02907374023684	0.999844386804454	1.05915758174092
		Simple mode	7	0.0232561728555363	0.0299210601163558	0.466540571873124	-0.0353891	0.0819014506835936	1.02352870623719	0.965229767476751	1.08534884417228
		Weighted mode	7	0.0134056266996489	0.0222847938028464	0.56948333826203	-0.0302726	0.0570838225532279	1.01349588498525	0.970181056076332	1.0587445533478
hsa-miR-182-5p	finngen_R5_M13_LOWBACKPAINORANDSCIATICA	MR Egger	3	-0.107627	0.115665562782643	0.522909513801325	-0.334331	0.119077844799294	0.897962780849203	0.715816692179303	1.12645760374146
		Weighted median	3	0.0159244528133472	0.0231025572456836	0.490638307848497	-0.0293566	0.0612054650148871	1.01605192264228	0.971070158549336	1.06311732516556
		Inverse variance weighted	3	0.0240650371639213	0.0188274568354101	0.201183000837397	-0.0128368	0.0609668525613252	1.02435693699426	0.987245261785847	1.06286368239454
		Simple mode	3	0.0146826810708891	0.0283693327682641	0.656325072063228	-0.0409212	0.0702865732966867	1.01479100112625	0.959904756755668	1.07281557750312
		Weighted mode	3	0.0112218979890962	0.0249908371929391	0.697369554453893	-0.0377601	0.0602039388872567	1.01128509967939	0.962943882111945	1.06205311839207
hsa-miR-183-3p	finngen_R5_M13_LOWBACKPAINORANDSCIATICA	MR Egger	7	-0.0180414	0.0254946016729525	0.510770033107719	-0.0680109	0.031927974112334	0.982120327374153	0.934250323410223	1.03244313999341
		Weighted median	7	0.00805275483069956	0.0151789126176522	0.595749705818375	-0.0216979	0.0378034235612979	1.00808526546902	0.978535792468425	1.03852706286013
		Inverse variance weighted	7	0.0173474773976727	0.011785585802952	0.141041612616956	-0.00575227	0.0404472255714586	1.01749881874735	0.994264241856545	1.04127635548783
		Simple mode	7	0.00471592747466788	0.0222914966555488	0.839455473109179	-0.0389754	0.0484072609195436	1.00472706496162	0.961774362762828	1.04959802855062
		Weighted mode	7	0.00376884895782137	0.0172783541842037	0.83456079584087	-0.0300967	0.0376344231588607	1.00377595999973	0.970351671507733	1.03835156619849
hsa-miR-196b-5p	finngen_R5_M13_LOWBACKPAINORANDSCIATICA	MR Egger	4	0.0736523973724443	0.161779411162569	0.693566432254535	-0.243435	0.390740043251079	1.07643256966771	0.783930235042656	1.47807422809553
		Weighted median	4	0.0259389702688993	0.0255406875071519	0.309822739347392	-0.0241208	0.0759987177829169	1.02627831307267	0.976167803779759	1.07896119069393
		Inverse variance weighted	4	0.0342493516418339	0.0327130327004843	0.295116406713632	-0.0298682	0.098366895734783	1.03484261426439	0.970573454025868	1.10336753169535
		Simple mode	4	-0.0170699	0.0433433724881765	0.720029731864199	-0.102023	0.0678831085796901	0.983074963821326	0.903008862077531	1.07024019926985
		Weighted mode	4	0.0323790169127977	0.0268242704019709	0.313895411146649	-0.0201966	0.0849545869006607	1.0329089210743	0.980006031176164	1.08866762580474
hsa-miR-204-5p	finngen_R5_M13_LOWBACKPAINORANDSCIATICA	MR Egger	6	-0.029782	0.0188016869375152	0.188366146788024	-0.0666333	0.00706933838860736	0.970657144788592	0.935538224245866	1.00709438514779
		Weighted median	6	-0.0304584	0.0106958430975497	0.00440379929268926	-0.0514223	-0.00949458	0.970000753799071	0.949877468869318	0.990550353290054
		Inverse variance weighted	6	-0.0300105	0.00892875288188158	0.000776317061645914	-0.0475108	-0.0125101	0.970435379548146	0.953600156134956	0.987567818461511
		Simple mode	6	-0.0312053	0.015065946645144	0.0930921702039397	-0.0607345	-0.00167601	0.96927659495545	0.941073043123091	0.998325395030517
		Weighted mode	6	-0.0305011	0.0142254575630362	0.0848740474952465	-0.058383	-0.00261916	0.969959407591196	0.943288643017751	0.99738426762439
hsa-miR-218-5p	finngen_R5_M13_LOWBACKPAINORANDSCIATICA	MR Egger	5	-0.00424073	0.0100615735631435	0.701783174594465	-0.0239614	0.0154799510023574	0.995768246030256	0.976323378159612	1.01560038608445
		Weighted median	5	-0.00750065	0.00815814025226892	0.357882978778329	-0.0234906	0.0084893075319818	0.992527412293938	0.976783154182846	1.00852544388833
		Inverse variance weighted	5	-0.00901877	0.00717707747661943	0.208895849097838	-0.0230858	0.00504830348922741	0.991021778739925	0.977178598947929	1.00506106764336
		Simple mode	5	-0.0104292	0.0115274210087226	0.416773493515494	-0.0330229	0.0121645477119687	0.989624998045898	0.967516361952659	1.01223883674772
		Weighted mode	5	-0.0067445	0.00915164101837484	0.502029112234931	-0.0246817	0.011192713436035	0.993278190153524	0.975620383701179	1.01125558620641
hsa-miR-329	finngen_R5_M13_LOWBACKPAINORANDSCIATICA	MR Egger	3	-0.069929	0.271204489841216	0.839349299513037	-0.60149	0.461631767440467	0.932459991774067	0.547994607321303	1.58666093542321
		Weighted median	3	-0.0105699	0.0308215527485435	0.731643565153887	-0.0709802	0.049840298708656	0.989485720886816	0.931480346372269	1.05110322042974
		Inverse variance weighted	3	-0.0225766	0.0542749106686231	0.677434002839521	-0.128955	0.0838022421508785	0.97767636117251	0.879013161916529	1.08741382792433
		Simple mode	3	0.00929075565596971	0.0487345554366959	0.866405524678462	-0.086229	0.104810484311894	1.00933404869745	0.917384150968558	1.11050013321509
		Weighted mode	3	-0.00501798	0.0347070836769825	0.898295935723944	-0.0730439	0.0630079004256777	0.994994585465857	0.929560051573922	1.06503525342993
hsa-miR-339-3p	finngen_R5_M13_LOWBACKPAINORANDSCIATICA	MR Egger	7	0.0128995101835578	0.014754392342296	0.421964373833019	-0.0160191	0.041818119174458	1.01298306776244	0.984108524576685	1.04270481349077
		Weighted median	7	-0.00486939	0.00941738047321333	0.605111549814784	-0.0233275	0.0135886782108043	0.995142448731148	0.976942528390611	1.01368142391962
		Inverse variance weighted	7	-0.00967806	0.00787538090242531	0.21910883872547	-0.0251138	0.00575768125893602	0.990368616446512	0.975198916491481	1.00577428856357
		Simple mode	7	-0.00926331	0.0129745891098377	0.502068666187787	-0.0346935	0.0161668810208145	0.990779458682261	0.965901411670776	1.01629827214841
		Weighted mode	7	-0.00478691	0.00917193844780781	0.62043309818656	-0.0227639	0.0131900941193957	0.99522453373287	0.977493238193144	1.01327746714101
hsa-miR-339-5p	finngen_R5_M13_LOWBACKPAINORANDSCIATICA	MR Egger	7	0.0119028322777605	0.0142393386513915	0.441308138438927	-0.0160063	0.0398119360344879	1.01197395288465	0.98412114814085	1.04061505359542
		Weighted median	7	-0.00539015	0.00967838378680696	0.577577758452175	-0.0243598	0.013579485378383	0.994624353932271	0.975934525775311	1.01367210535899
		Inverse variance weighted	7	-0.0119152	0.00790441793553514	0.13170589459144	-0.0274078	0.00357746969230648	0.988155515309746	0.972964338433784	1.00358387647475
		Simple mode	7	-0.00994354	0.0163447403755804	0.565249986016148	-0.0419792	0.0220921513225176	0.990105733725354	0.958889695593941	1.02233798992762
		Weighted mode	7	-0.00497827	0.0095794978575122	0.621893919299162	-0.0237541	0.0137975433517777	0.995034098611991	0.9765258194073	1.01389316874541
hsa-miR-370	finngen_R5_M13_LOWBACKPAINORANDSCIATICA	MR Egger	9	-0.00382048	0.0150781398817065	0.807256100408362	-0.0333736	0.0257326741795854	0.996186808759985	0.967177121662224	1.02606661770685
		Weighted median	9	0.000451871312992208	0.00653334764772144	0.944859217639775	-0.0123535	0.0132572327025262	1.00045197342221	0.987722501041615	1.01334549943824
		Inverse variance weighted	9	0.000708919905939329	0.00813143641676295	0.930526356447148	-0.0152287	0.0166465352827947	1.00070917124905	0.984886674723641	1.01678586087374
		Simple mode	9	-0.00650968	0.0123696717442708	0.612980092816955	-0.0307542	0.0177348761003891	0.993511461550929	0.969713863448589	1.01789307283158
		Weighted mode	9	0.00407819920854255	0.00731911041697175	0.592634685298169	-0.0102673	0.0184236556258072	1.00408652637904	0.98978527114881	1.01859441824766
hsa-miR-376a-3p	finngen_R5_M13_LOWBACKPAINORANDSCIATICA	MR Egger	5	0.0106447236998328	0.0385897484822831	0.800578393630051	-0.0649912	0.0862806307251077	1.01070158033312	0.937075725232688	1.09011220436237
		Weighted median	5	0.00267307061251331	0.012827393177163	0.834926280726352	-0.0224686	0.0278147612397528	1.00267664645121	0.977781919494163	1.02820520332259
		Inverse variance weighted	5	-2.81e-07	0.0194785487180962	0.999988502308267	-0.0381782	0.0381776747973041	0.999999719309875	0.962541365907346	1.03891580563623
		Simple mode	5	-0.0278833	0.0224130954760522	0.281399058717245	-0.0718129	0.0160463872219243	0.972501870681791	0.930704970645829	1.01617582188619
		Weighted mode	5	0.00279418323223671	0.0122123824608749	0.830246717623674	-0.0211421	0.0267304528555514	1.00279809060066	0.979079840764743	1.02709091602465
hsa-miR-382-5p	finngen_R5_M13_LOWBACKPAINORANDSCIATICA	MR Egger	10	0.00731263248035494	0.0159941683597879	0.659682666114886	-0.0240359	0.0386612024655392	1.00733943506991	0.976250625115931	1.03941827164154
		Weighted median	10	-0.00390918	0.007859809186583	0.618932899925217	-0.0193144	0.0114960455829055	0.996098450476233	0.980870921634201	1.01156237906213
		Inverse variance weighted	10	-0.00697854	0.00965006777655295	0.46958167799487	-0.0258927	0.0119355912034562	0.993045751839249	0.974439666240051	1.01200710460718
		Simple mode	10	-0.00682055	0.0130434171927377	0.613663662653774	-0.0323857	0.0187445427646223	0.993202652259701	0.968133146980508	1.01892132454335
		Weighted mode	10	0.00118525802828123	0.00794554460353518	0.884706547951249	-0.014388	0.0167585254512102	1.00118596072418	0.985715003371178	1.01689973726994
hsa-miR-409-3p	finngen_R5_M13_LOWBACKPAINORANDSCIATICA	MR Egger	10	-0.0059144	0.0167780000204052	0.733563046652265	-0.0387993	0.0269704775873373	0.994103053195332	0.961943768725968	1.02733747283497
		Weighted median	10	-0.00135111	0.0084265749251726	0.872613526619999	-0.0178672	0.0151649727781303	0.998649798268474	0.982291471092296	1.01528054445253
		Inverse variance weighted	10	0.000289959190049677	0.00992354949542588	0.976689687001017	-0.0191602	0.0197401162010844	1.00029000123228	0.981022192036478	1.01993624067586
		Simple mode	10	-0.00844413	0.0162183964914675	0.615174886787906	-0.0402322	0.0233439249609239	0.991591419383941	0.960566380035778	1.02361852697701
		Weighted mode	10	0.00208316952807697	0.01002557728381	0.84002220112537	-0.017567	0.0217333010043445	1.00208534083319	0.982586437559988	1.02197118943183
hsa-miR-411-3p	finngen_R5_M13_LOWBACKPAINORANDSCIATICA	MR Egger	4	0.0501462168553457	0.0537288280411164	0.449182641594602	-0.0551623	0.155454719815934	1.05142482116816	0.946331559028164	1.16818903905496
		Weighted median	4	0.0236769813434045	0.0149027257218574	0.11211266507052	-0.00553236	0.052886323758245	1.02395950644018	0.994482914255553	1.05430978833267
		Inverse variance weighted	4	0.00896590475493765	0.0301247524300939	0.765988750181983	-0.0500786	0.0680104195179216	1.00900621887308	0.951155	1.07037646122739
		Simple mode	4	0.0215763438624491	0.0152658003352428	0.25243676544512	-0.00834462	0.051497312519525	1.02181079634259	0.991690094945335	1.0528463567843
		Weighted mode	4	0.0253969440802081	0.0134601198558251	0.155641108420206	-0.000984891	0.0517787789976253	1.02572219407924	0.999015594008585	1.05314273944926
hsa-miR-494	finngen_R5_M13_LOWBACKPAINORANDSCIATICA	MR Egger	3	0.0070219523400593	0.034959090303132	0.873806519337316	-0.0614979	0.0755417693341981	1.00704666405502	0.940354953720399	1.07846827367902
		Weighted median	3	-0.0121684	0.0153130721010769	0.426820317683091	-0.0421821	0.0178451726019544	0.987905287467894	0.958695215010739	1.0180053490682
		Inverse variance weighted	3	-0.0298014	0.0316962161801607	0.347105367782144	-0.091926	0.0323232070652464	0.970638305837348	0.912172683981189	1.03285127619347
		Simple mode	3	-0.012891	0.0187390916028497	0.562574277944071	-0.0496196	0.0238376611201702	0.987191774101027	0.951591361976167	1.02412404924409
		Weighted mode	3	-0.0116982	0.0151434531039103	0.520619875902515	-0.0413794	0.0179829509979465	0.988369941020776	0.959465054077616	1.01814561787509
hsa-miR-543	finngen_R5_M13_LOWBACKPAINORANDSCIATICA	MR Egger	9	-0.0033274	0.0156481347279239	0.837668361482139	-0.0339977	0.0273429443328969	0.996678129925831	0.96657368541805	1.02772019315094
		Weighted median	9	-0.00061367	0.00789057176271642	0.938008990776902	-0.0160792	0.0148518508528497	0.999386518454727	0.984049389648778	1.01496268762032
		Inverse variance weighted	9	0.0025660204766031	0.0102009250527569	0.801390594049065	-0.0174278	0.0225598335800067	1.00256931552493	0.982723192963568	1.02281623109041
		Simple mode	9	-0.00352865	0.0136992868341636	0.803233621127611	-0.0303793	0.0233219536066742	0.996477569775853	0.970077561101141	1.0235960369388
		Weighted mode	9	0.00435503938627824	0.00773195644105523	0.588697549140956	-0.0107996	0.0195096740107465	1.00436453635185	0.989258511027633	1.01970123141361
hsa-miR-598	finngen_R5_M13_LOWBACKPAINORANDSCIATICA	MR Egger	4	-0.0969763	0.276715681350238	0.759466486009811	-0.639339	0.44538639145485	0.907577475539701	0.527641037638498	1.56109327241403
		Weighted median	4	-0.0466079	0.0581303611146392	0.422679002409725	-0.160543	0.0673276235364208	0.95446158364482	0.851680866605899	1.06964586193449
		Inverse variance weighted	4	-0.0245928	0.0457737987544874	0.5910826551005	-0.114309	0.0651238581244002	0.975707151354803	0.89198190454432	1.06729120888528
		Simple mode	4	-0.0601029	0.0760170480550572	0.486886813682367	-0.209096	0.0888905227181892	0.941667639032152	0.811317097454276	1.09296099537747
		Weighted mode	4	-0.049991	0.0625902804004901	0.482847433969323	-0.172668	0.0726859649102085	0.951238000182017	0.84141697420965	1.07539277281662
hsa-miR-654-5p	finngen_R5_M13_LOWBACKPAINORANDSCIATICA	MR Egger	8	-0.0070571	0.0179856231027748	0.708340881666925	-0.0423089	0.0281947226388115	0.992967744204174	0.95857361234117	1.02859595584089
		Weighted median	8	-0.00293901	0.00890531712781723	0.741378384669026	-0.0203934	0.0145154126110453	0.99706530569938	0.979813109074556	1.01462127279392
		Inverse variance weighted	8	-0.0037968	0.0105171255473432	0.718091148470501	-0.0244104	0.0168167669989638	0.996210399654185	0.975885158321276	1.01695896480929
		Simple mode	8	-0.00865626	0.0162376104381479	0.610464058475748	-0.040482	0.0231694605118761	0.991381101566837	0.960326476731517	1.02343995751213
		Weighted mode	8	0.00296674685646965	0.00871534756165157	0.7435388139428	-0.0141153	0.0200488280773067	1.00297115200517	0.98598381988768	1.02025115571285
hsa-miR-668	finngen_R5_M13_LOWBACKPAINORANDSCIATICA	MR Egger	12	-0.00661681	0.0109072225154679	0.557607274763297	-0.027995	0.0147613474403674	0.993405034185408	0.972393262963771	1.01487083419014
		Weighted median	12	-0.00198543	0.00619890034123338	0.748750317589873	-0.0141353	0.0101644137179394	0.998016538713393	0.985964158328618	1.01021624683996
		Inverse variance weighted	12	0.00043194509737834	0.00696577139685472	0.950555141364079	-0.013221	0.0140848570352136	1.0004320383991	0.986866046253787	1.01418451597835
		Simple mode	12	-0.00716517	0.0113276679780483	0.539961368465141	-0.0293674	0.0150370560560393	0.992860435472439	0.971059629263834	1.01515068139929
		Weighted mode	12	0.00117361372358057	0.00620672614077218	0.853467952198539	-0.0109916	0.013338796959494	1.00117430267766	0.989068617070999	1.0134281555818
hsa-miR-1270	finngen_R5_M13_LOWBACKPAINORANDSCIATICA	MR Egger	6	0.00035469710802048	0.00492990692958786	0.946097089857837	-0.00930792	0.0100173146900127	1.00035476002048	0.990735264127661	1.01006765594112
		Weighted median	6	0.00161326241724014	0.00402375279963029	0.688468147263786	-0.00627329	0.00949981790451551	1.00161456442512	0.993746342950642	1.00954508440224
		Inverse variance weighted	6	0.00239867033155801	0.00387049851619226	0.535434491713069	-0.00518751	0.00998484742329484	1.00240154944279	0.994825925116993	1.01003486233749
		Simple mode	6	0.00462405809924809	0.00945842891666858	0.645613351982289	-0.0139145	0.0231625787759185	1.0046347655535	0.986181896112777	1.02343291449281
		Weighted mode	6	0.00168735291613732	0.00417137367613546	0.702562642758747	-0.00648854	0.00986324532136282	1.0016887772971	0.993532465627865	1.00991204744263
hsa-miR-1303	finngen_R5_M13_LOWBACKPAINORANDSCIATICA	MR Egger	14	-0.0336617	0.0244163805477129	0.193159763966238	-0.0815178	0.0141943703772721	0.966898516773047	0.921716265026488	1.01429558879603
		Weighted median	14	-0.0185041	0.0118954802200214	0.119813434733192	-0.0418192	0.00481104191907508	0.981666050427959	0.959043121018953	1.00482263356309
		Inverse variance weighted	14	-0.0199734	0.0114313045562998	0.0805934500934522	-0.0423787	0.00243197497313113	0.980224764624226	0.958506688061439	1.00243493462304
		Simple mode	14	0.00914208665939711	0.0197375905177246	0.650892906266233	-0.0295436	0.0478277640741372	1.00918400317106	0.970888554953298	1.04898996600631
		Weighted mode	14	-0.0149183	0.0119647811683428	0.23445122299781	-0.0383692	0.00853271715748148	0.985192471921757	0.962357548797877	1.0085692245504
